# Supplementary material for: Bioactive Compounds and Antioxidant Activity in the Fruit of Rosehip (Rosa canina L. and Rosa rubiginosa L.)
Source: MDPI journal article supplement (doi:10.3390/molecules28083544), 2023-04-18

**Table S1:** Concentration of individual phenolic compounds in fruit of *Rosa* spp. by HPLC-DAD and antioxidant activity by spectrometry methods. Where: HCAD1: hydroxycinnamic acid, FLAV1: flavonol 1, FLAV2: flavonol 2, FLAV3: flavonol 3, FLAV4: flavonol 4, FLAV6: flavonol 6, FLAV7: flavonol 7, ANT1: anthocyanin all with the same unit of measurement ( $\mu\text{g g}^{-1}$ ).

| Sample            | HCAD1<br>$\mu\text{g g}^{-1}$ | FLAV1<br>$\mu\text{g g}^{-1}$ | FLAV2<br>$\mu\text{g g}^{-1}$ | FLAV3<br>$\mu\text{g g}^{-1}$ | FLAV4<br>$\mu\text{g g}^{-1}$ | FLAV6<br>$\mu\text{g g}^{-1}$ | FLAV7<br>$\mu\text{g g}^{-1}$ | ANT1<br>$\mu\text{g g}^{-1}$ |
|-------------------|-------------------------------|-------------------------------|-------------------------------|-------------------------------|-------------------------------|-------------------------------|-------------------------------|------------------------------|
| <b>Carahue</b>    | 23.5 $\pm$ 0.3g               | 63.7 $\pm$ 0.3f               | 36.8 $\pm$ 0.3d               | 69.5 $\pm$ 0.1d               | 9.9 $\pm$ 0.1d                | 17.9 $\pm$ 0.1e               | 12.2 $\pm$ 0.4g               | 37.3 $\pm$ 0.0b              |
| <b>Gorbea</b>     | 19.0 $\pm$ 0.2h               | 131.1 $\pm$ 2.6b              | 52.1 $\pm$ 1.0b               | 81.3 $\pm$ 0.4c               | 11.3 $\pm$ 0.7c               | 25.1 $\pm$ 1.1b               | 15.0 $\pm$ 0.1e               | 29.7 $\pm$ 0.2e              |
| <b>Imperial</b>   | 27.1 $\pm$ 0.1de              | 72.7 $\pm$ 0.5e               | 31.8 $\pm$ 0.1e               | 71.0 $\pm$ 0.5d               | 10.2 $\pm$ 0.3d               | 17.8 $\pm$ 0.1e               | 13.6 $\pm$ 0.2f               | 23.9 $\pm$ 0.2g              |
| <b>Loncoche</b>   | 38.6 $\pm$ 0.2a               | 169.4 $\pm$ 2.5a              | 67.8 $\pm$ 1.8a               | 116.1 $\pm$ 0.6a              | 16.3 $\pm$ 0.1a               | 34.6 $\pm$ 0.2a               | 23.9 $\pm$ 0.2b               | 31.8 $\pm$ 0.2d              |
| <b>Lonquimay</b>  | 33.9 $\pm$ 0.2b               | 120.8 $\pm$ 0.9c              | 43.9 $\pm$ 0.2c               | 97.4 $\pm$ 0.2b               | 14.6 $\pm$ 0.4b               | 21.0 $\pm$ 0.2d               | 30.9 $\pm$ 0.4a               | 25.2 $\pm$ 0.0f              |
| <b>Osorno</b>     | 27.8 $\pm$ 0.0d               | 53.1 $\pm$ 0.2g               | 23.4 $\pm$ 0.3f               | 44.8 $\pm$ 0.5f               | 6.7 $\pm$ 0.1f                | 11.0 $\pm$ 0.0g               | 11.8 $\pm$ 0.3g               | 19.8 $\pm$ 0.2h              |
| <b>Pitrufquen</b> | 32.2 $\pm$ 0.4c               | 70.5 $\pm$ 0.8e               | 33.7 $\pm$ 1.2e               | 61.1 $\pm$ 0.5e               | 8.9 $\pm$ 0.1e                | 16.4 $\pm$ 0.3f               | 18.9 $\pm$ 0.3c               | 40.2 $\pm$ 0.2a              |
| <b>Villarrica</b> | 26.9 $\pm$ 0.2e               | 114.1 $\pm$ 2.7d              | 50.1 $\pm$ 1.9b               | 84.2 $\pm$ 1.8c               | 11.3 $\pm$ 0.4c               | 22.6 $\pm$ 0.4c               | 17.2 $\pm$ 0.2d               | 33.9 $\pm$ 0.3c              |
| <b>Melipeuco</b>  | 23.8 $\pm$ 0.2fg              | 26.4 $\pm$ 0.1h               | 16.0 $\pm$ 0.2f               | 30.6 $\pm$ 0.3g               | 3.1 $\pm$ 0.1g                | 3.3 $\pm$ 0.1h                | 14.2 $\pm$ 0.1ef              | 10.0 $\pm$ 0.1j              |
| <b>Icalma</b>     | 24.4 $\pm$ 0.4g               | 134.6 $\pm$ 1.5b              | 31.4 $\pm$ 0.9e               | 97.7 $\pm$ 2.4b               | 9.5 $\pm$ 0.2de               | 15.3 $\pm$ 0.5f               | 18.7 $\pm$ 0.7c               | 11.1 $\pm$ 0.1i              |

**Table S2:** Analytical parameters for HPLC and spectrophotometric methods. Where DL: detection limit, QL: quantification limit, LR: linear range, CV% coefficient of variation, TEAC: Trolox equivalent antioxidant capacity, CUPRAC: cupric reducing antioxidant capacity, DPPH: 2,2-diphenyl radical methods and ORAC: oxygen radical absorbance capacity.

| Method | Standard             | Equation              | R <sup>2</sup> | DL                         | QL                         | LR                               | CV%  |
|--------|----------------------|-----------------------|----------------|----------------------------|----------------------------|----------------------------------|------|
| Folin  | Gallic acid          | y = 0,0005x - 0,00367 | 0.9925         | 12.489 mg L <sup>-1</sup>  | 41.633 mg L <sup>-1</sup>  | 41.633 – 500 mg L <sup>-1</sup>  | 3.28 |
| TEAC   | Trolox               | y = 0,3104x + 0,1593  | 0.9958         | 0.048 mmol L <sup>-1</sup> | 0.162 mmol L <sup>-1</sup> | 0.162- 0.7 mmol L <sup>-1</sup>  | 4.64 |
| CUPRAC | Trolox               | y = 3.0604x + 0.1344  | 0.9961         | 0.055 mmol L <sup>-1</sup> | 0.183 mmol L <sup>-1</sup> | 0.183 – 0.7 mmol L <sup>-1</sup> | 1.49 |
| DPPH   | Trolox               | y = 0.5996x + 0.0139  | 0.9957         | 0.043 mmol L <sup>-1</sup> | 0.144 mmol L <sup>-1</sup> | 0.144 – 0.7 mmol L <sup>-1</sup> | 4.53 |
| ORAC   | Trolox               | y = 0.6457x + 10.185  | 0.9905         | 2.170 umol L <sup>-1</sup> | 7.234 umol L <sup>-1</sup> | 7.234 – 80 umol L <sup>-1</sup>  | 4.10 |
| HPLC   | Cyanidin-3-glucoside | y = 63289X + 3818.7   | 1              | 0.072 mg L <sup>-1</sup>   | 0.241 mg L <sup>-1</sup>   | 0.241 – 100 mg L <sup>-1</sup>   | 1.22 |
|        | Quercetin            | y=13318x + 1424.8     | 0.9999         | 0.102 mg L <sup>-1</sup>   | 0.340 mg L <sup>-1</sup>   | 0.340 – 100 mg L <sup>-1</sup>   | 4.41 |
|        | Chlorogenic acid     | y= 73284x + 6553.5    | 1              | 0.042 mg L <sup>-1</sup>   | 0.140 mg L <sup>-1</sup>   | 0.140 - 100 mg L <sup>-1</sup>   | 0.46 |
|        | Citric acid          | y= 1274.2x – 3763.9   | 0.9996         | 0.198 mg L <sup>-1</sup>   | 0.661 mg L <sup>-1</sup>   | 0.661 – 500 mg L <sup>-1</sup>   | 1.36 |
|        | Catechin             | y= 57083x + 3800.6    | 1              | 0.067 mg L <sup>-1</sup>   | 0.224 mg L <sup>-1</sup>   | 0.224 – 100 mg L <sup>-1</sup>   | 0.11 |

Figure S1: A) *Rosa rubiginosa* and B) *Rosa canina* fruits.

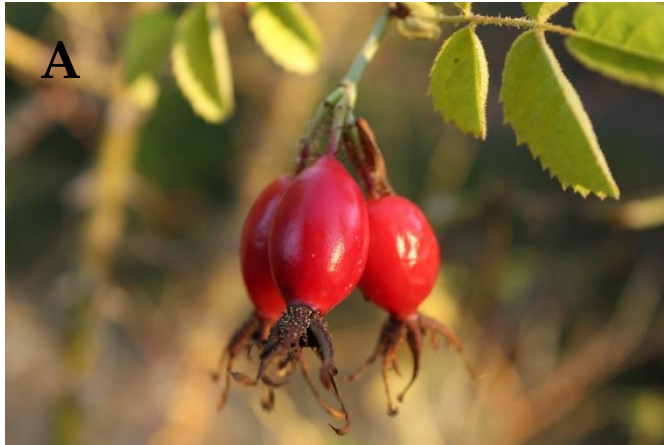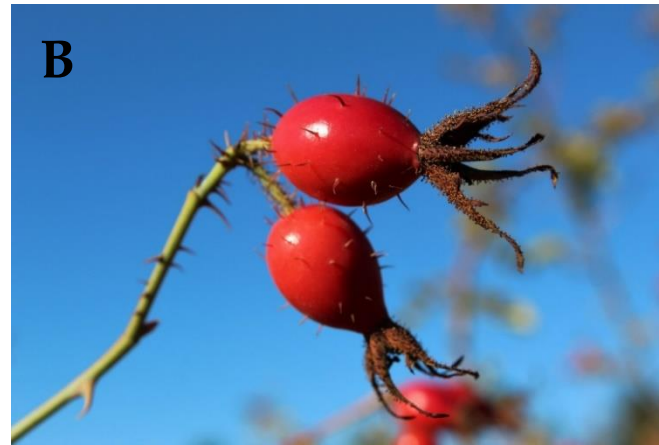

Supplement: s1 [file s1]
